# Supplementary material
Source: PubMed Central journal article supplement (PMC2607025)
Supplement: mmc1.pdf [file mmc1.pdf]

Changes in malaria indices between 1999 and 2007 in The Gambia: a retrospective analysis

Correspondence to:  
 Dr David J Conway, Medical  
 Research Council Laboratories,  
 Fajara, PO Box 273, Banjul,  
 The Gambia  
 dconway@mrc.gm

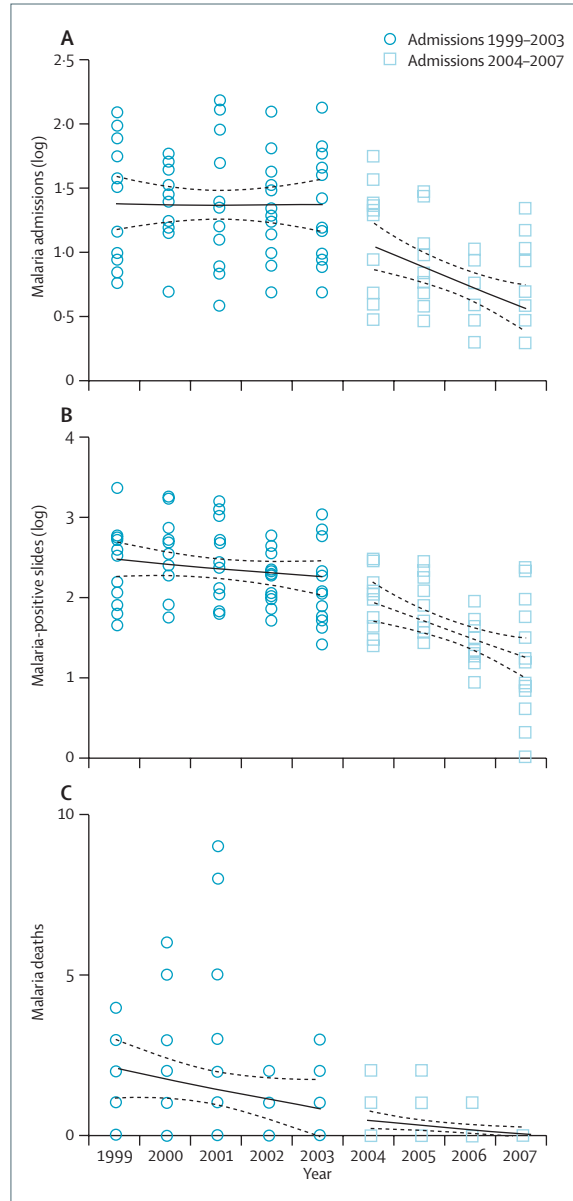

**Webfigure:** Linear regression on Fajara malaria admissions (A), malaria-positive slides (B), and malaria deaths (C) from 1999, to 2007, analysing distributions of monthly data across years, with log transformation of numbers for admissions and slide data
