# Supplementary material
Source: PubMed Central journal article supplement (PMC2607025)
Supplement: mmc2.pdf [file mmc2.pdf]

## Changes in malaria indices between 1999 and 2007 in The Gambia: a retrospective analysis

Correspondence to:  
Dr David J Conway, Medical  
Research Council Laboratories,  
Fajara, PO Box 273, Banjul,  
The Gambia  
dconway@mrc.gm

|                                | Slope (b) | SE of b | p value |
|--------------------------------|-----------|---------|---------|
| <b>Malaria admissions</b>      |           |         |         |
| 1999–2007                      | –0.109    | 0.01    | <0.0001 |
| 1999–2003                      | –0.007    | 0.04    | 0.95    |
| 2004–2007                      | –0.162    | 0.05    | 0.002   |
| <b>Malaria slides</b>          |           |         |         |
| 1999–2007                      | –0.157    | 0.01    | <0.0001 |
| 1999–2003                      | –0.058    | 0.04    | 0.19    |
| 2004–2007                      | –0.234    | 0.06    | <0.001  |
| <b>Malaria deaths*</b>         |           |         |         |
| 1999–2007                      | –0.47     | ..      | <0.0001 |
| 1999–2003                      | –0.25     | ..      | 0.05    |
| 2004–2007                      | –0.31     | ..      | 0.015   |
| <b>Non-malaria admissions</b>  |           |         |         |
| 1999–2007                      | –0.043    | 0.003   | <0.0001 |
| 1999–2003                      | –0.037    | 0.007   | <0.0001 |
| 2004–2007                      | –0.022    | 0.014   | 0.130   |
| <b>Malaria-negative slides</b> |           |         |         |
| 1999–2007                      | –0.013    | 0.006   | 0.047   |
| 1999–2003                      | 0.025     | 0.015   | 0.113   |
| 2004–2007                      | 0.002     | 0.022   | 0.929   |

Significance of linear trends in numbers over different periods in Fajara indicates that most decrease in malaria has occurred since 2003. We used a linear model to fit the data before and after 2003, and tested a null hypothesis that the number of malaria admissions, positive slides, and deaths remained unchanged for the study period. Dependent variables (malaria admissions and malaria-positive slides) were log-transformed and the residuals of these associations were normally distributed apart from malaria deaths for which the distribution remained highly heteroscedastic, hence we used a non-parametric test to measure the association (Spearman's  $r$ ). The analyses of admissions and slides incorporated adjustment for monthly rainfall during the study period. Yearly rainfall was not correlated (Spearman's  $r$  correlation coefficient,  $p$  value) with the number of malaria admissions per year ( $r=0.16$ ,  $p=0.66$ ), number of malaria-positive slides per year ( $r=0.46$ ,  $p=0.20$ ), or number of malaria deaths per year ( $r=0.46$ ,  $p=0.20$ ). \*Spearman's  $r$  was used to measure the association for malaria deaths.

**Webtable:** Linear regression on Fajara malaria admissions, malaria-positive slides, malaria deaths, non-malaria admissions, and malaria-negative slides from 1999 to 2007
